# Supplementary figures and images for: The effectiveness and safety of infliximab compared with biosimilar CT‐P13, in 3112 patients with ulcerative colitis
Source: PubMed Central journal article supplement — Aliment Pharmacol Ther. 2019 May 22;50(3):269–77. doi: 10.1111/apt.15323 (PMC6767082; doi:10.1111/apt.15323), 2019-05-22

Favors  
CT-P13

Favors  
Reference Product

0.80

1.00

1.25

Hazard Ratio (95%CI) for primary outcome

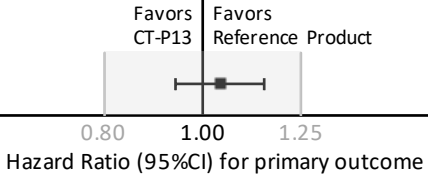

Supplement: APT-50-269-s001.pdf [file APT-50-269-s001.pdf]

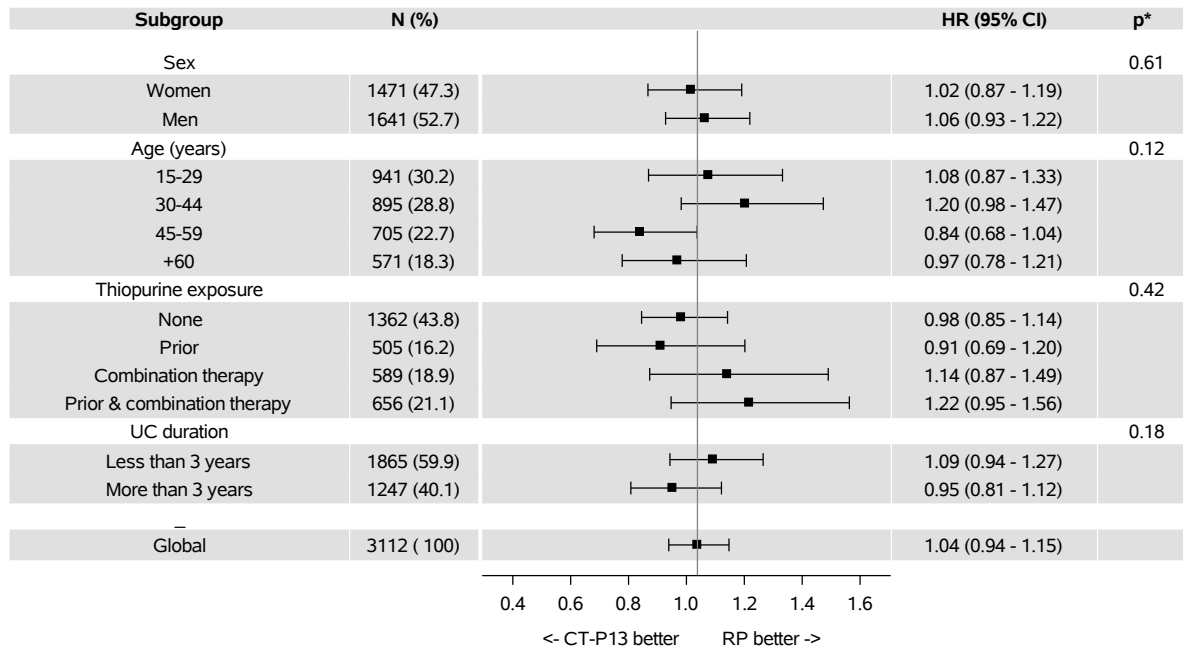

Supplement: APT-50-269-s002.pdf [file APT-50-269-s002.pdf]

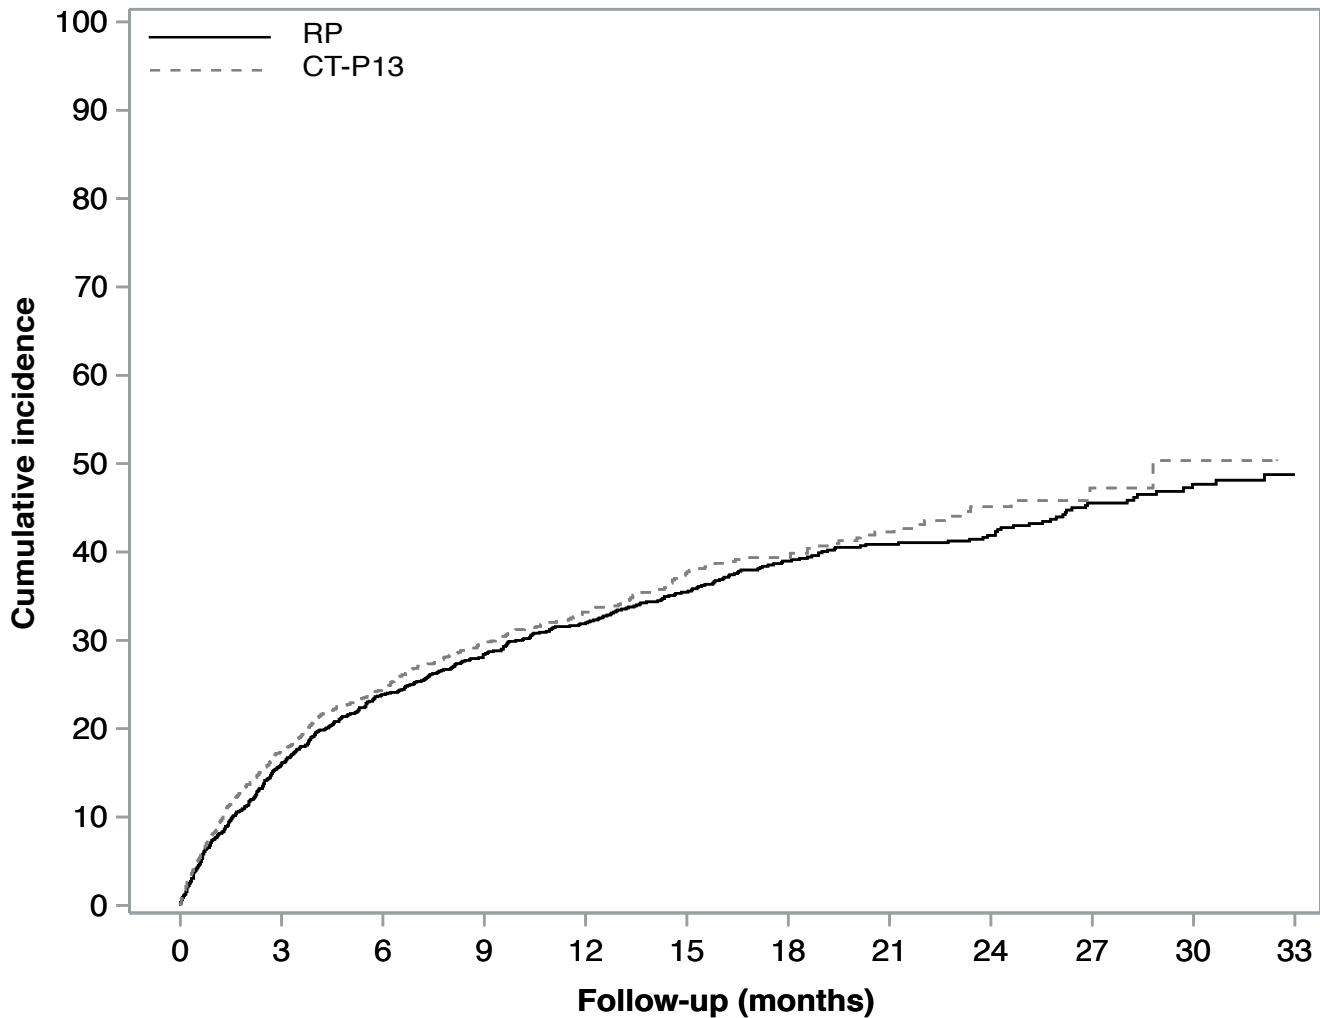

**Number at risk**

|        | 0    | 3    | 6    | 9   | 12  | 15  | 18  | 21  | 24  | 27  | 30  | 33 |
|--------|------|------|------|-----|-----|-----|-----|-----|-----|-----|-----|----|
| RP     | 1434 | 1130 | 909  | 735 | 622 | 514 | 407 | 341 | 271 | 200 | 127 | 60 |
| CT-P13 | 1678 | 1305 | 1008 | 701 | 497 | 335 | 244 | 158 | 96  | 37  | 7   | 0  |

Supplement: APT-50-269-s003.pdf [file APT-50-269-s003.pdf]

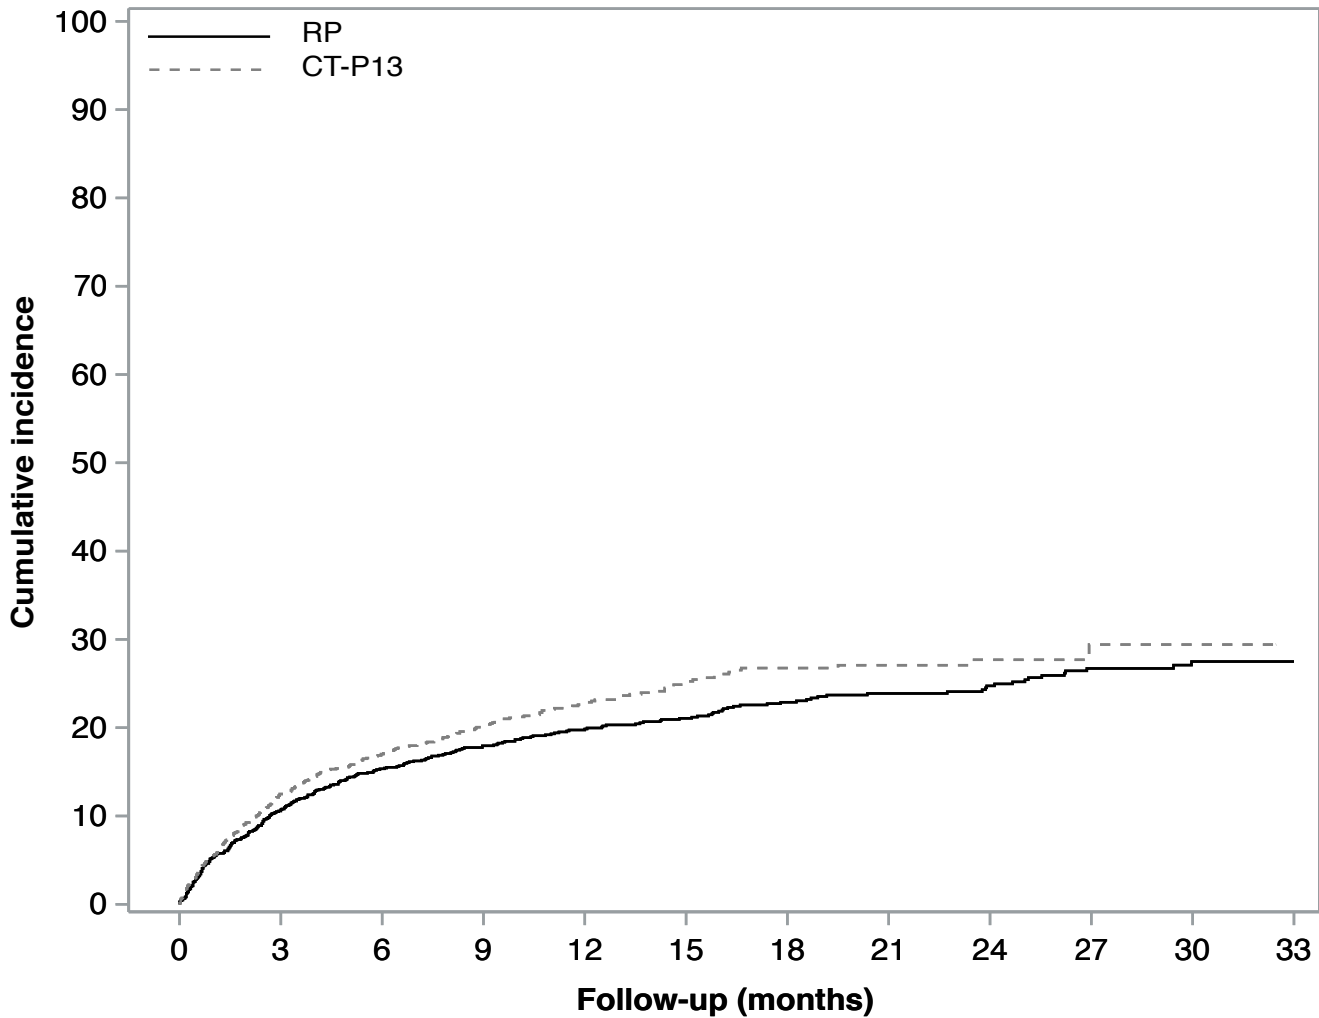

**Number at risk**

|        |      |      |      |     |     |     |     |     |     |     |     |    |
|--------|------|------|------|-----|-----|-----|-----|-----|-----|-----|-----|----|
| RP     | 1434 | 1197 | 992  | 820 | 707 | 603 | 492 | 417 | 341 | 267 | 177 | 78 |
| CT-P13 | 1678 | 1382 | 1094 | 779 | 556 | 390 | 277 | 185 | 109 | 41  | 8   | 0  |

Supplement: APT-50-269-s004.pdf [file APT-50-269-s004.pdf]

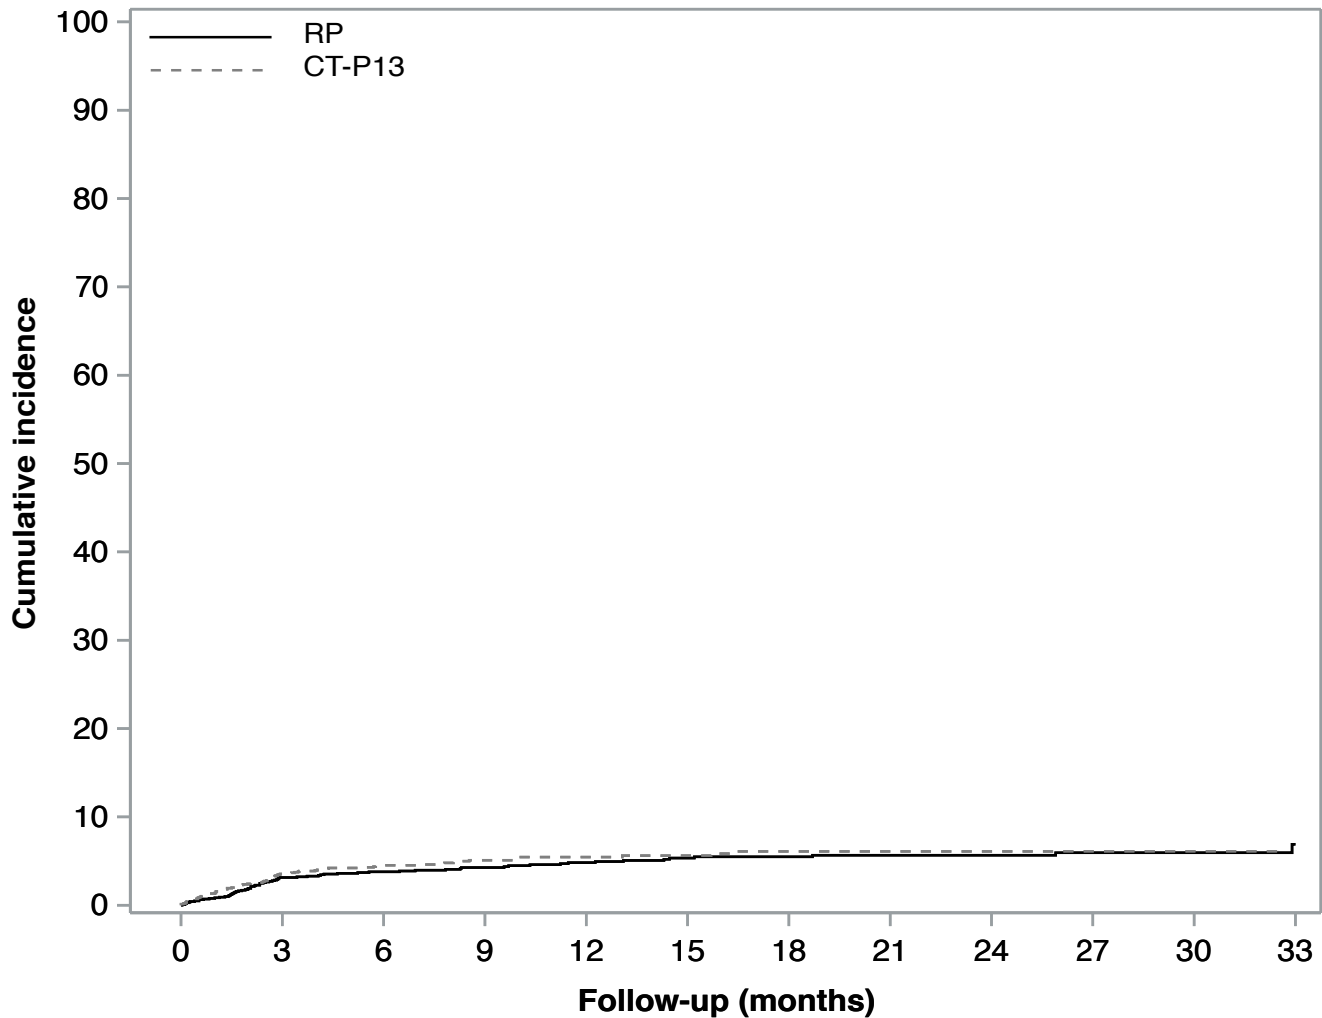

**Number at risk**

|        | 0    | 3    | 6    | 9   | 12  | 15  | 18  | 21  | 24  | 27  | 30  | 33 |
|--------|------|------|------|-----|-----|-----|-----|-----|-----|-----|-----|----|
| RP     | 1434 | 1299 | 1109 | 918 | 790 | 674 | 554 | 471 | 391 | 311 | 210 | 89 |
| CT-P13 | 1678 | 1515 | 1225 | 886 | 639 | 448 | 322 | 209 | 123 | 49  | 9   | 0  |

Supplement: APT-50-269-s005.pdf [file APT-50-269-s005.pdf]

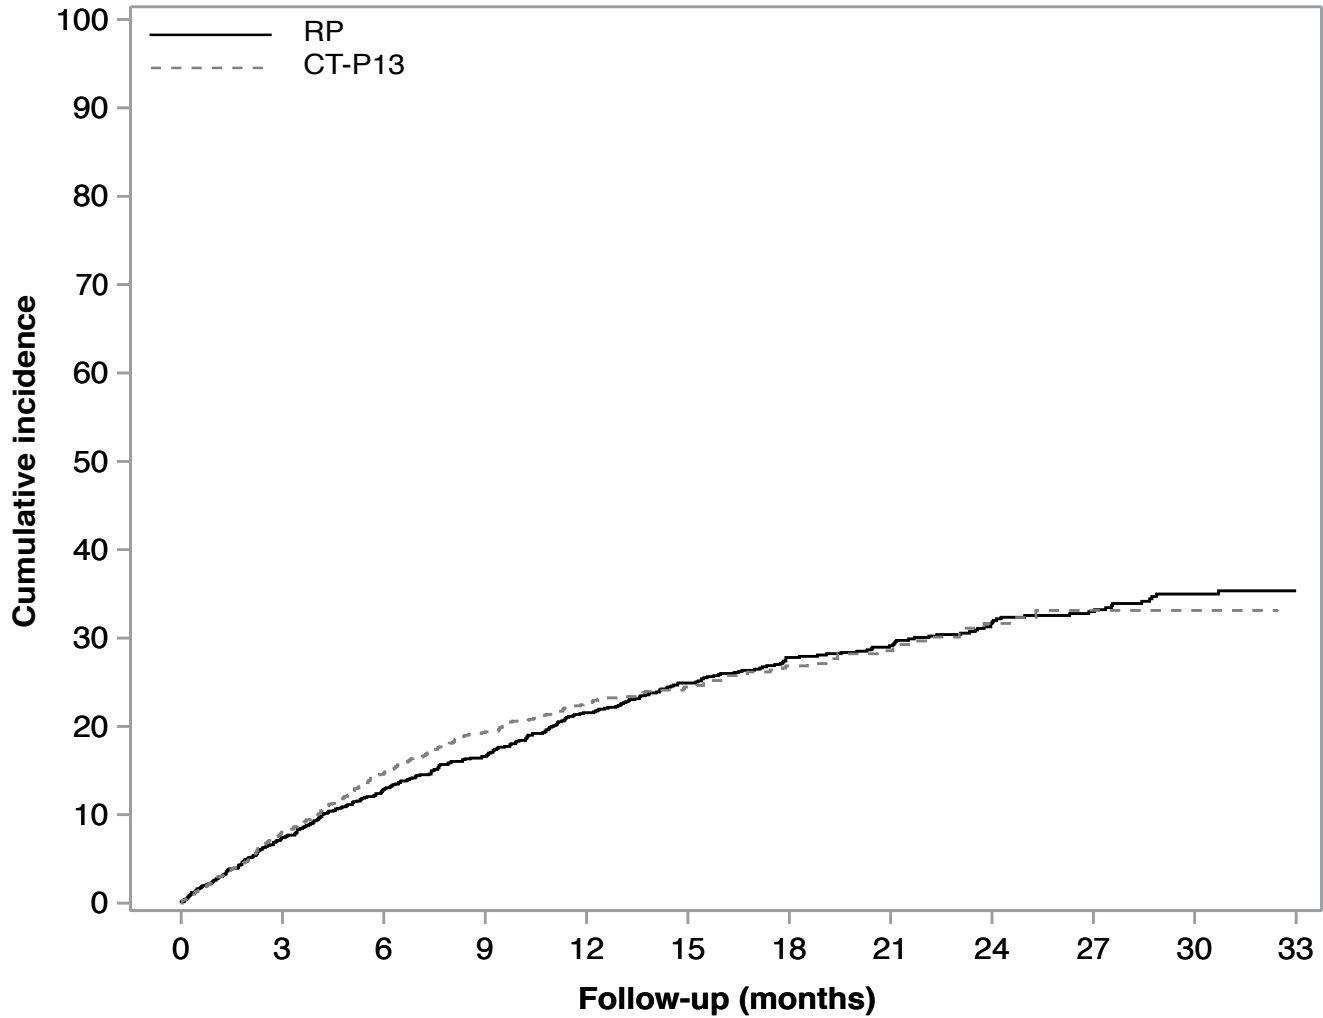

**Number at risk**

|        | 0    | 3    | 6    | 9   | 12  | 15  | 18  | 21  | 24  | 27  | 30  | 33 |
|--------|------|------|------|-----|-----|-----|-----|-----|-----|-----|-----|----|
| RP     | 1434 | 1248 | 1042 | 882 | 756 | 649 | 536 | 458 | 376 | 305 | 202 | 90 |
| CT-P13 | 1678 | 1441 | 1145 | 838 | 613 | 438 | 314 | 207 | 121 | 48  | 9   | 0  |

Supplement: APT-50-269-s006.pdf [file APT-50-269-s006.pdf]

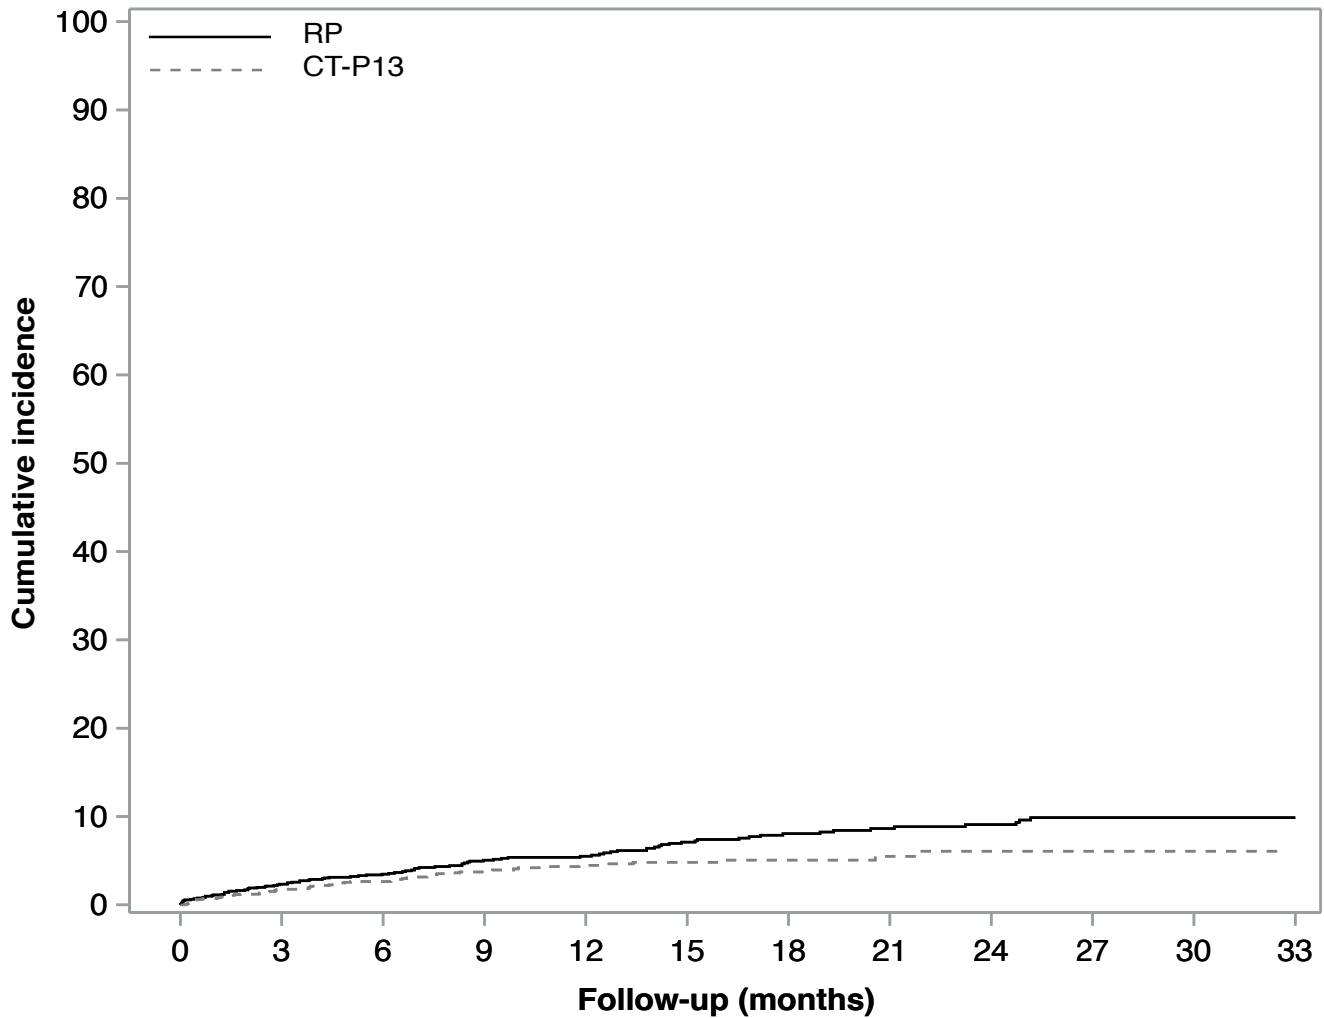

**Number at risk**

|        |      |      |      |     |     |     |     |     |     |     |     |    |
|--------|------|------|------|-----|-----|-----|-----|-----|-----|-----|-----|----|
| RP     | 1434 | 1307 | 1082 | 887 | 764 | 642 | 522 | 441 | 367 | 290 | 195 | 88 |
| CT-P13 | 1678 | 1537 | 1210 | 866 | 622 | 436 | 313 | 203 | 120 | 50  | 9   | 0  |

Supplement: APT-50-269-s007.pdf [file APT-50-269-s007.pdf]

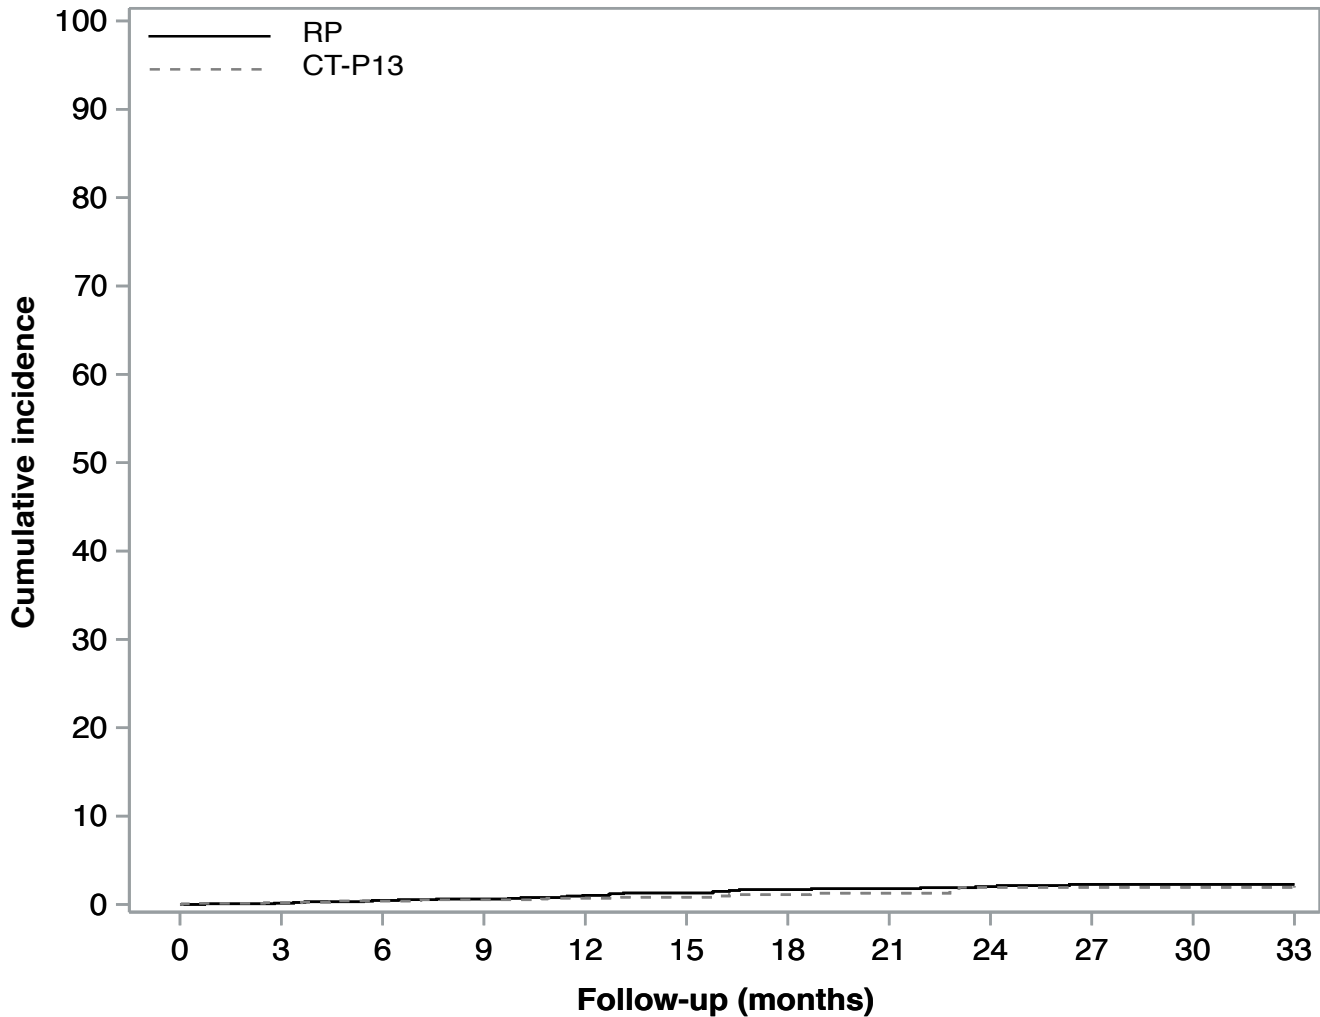

**Number at risk**

|        |      |      |      |      |      |      |     |     |     |     |     |     |
|--------|------|------|------|------|------|------|-----|-----|-----|-----|-----|-----|
| RP     | 1364 | 1321 | 1290 | 1219 | 1151 | 1064 | 983 | 902 | 799 | 666 | 475 | 238 |
| CT-P13 | 1609 | 1533 | 1466 | 1244 | 1006 | 774  | 608 | 422 | 261 | 118 | 41  | 25  |

Supplement: APT-50-269-s008.pdf [file APT-50-269-s008.pdf]
